# Supplementary material
Source: publisher figshare collection journal article supplement (https://gsapubs.figshare.com/articles/dataset/_/12542942)
Supplement: Supplementary file 1 [file 1]

## Sheet: sedimentation_rate_database_Cyp
Formation, member, location	Country	Age base (Ma)	Age top (Ma)	Duration (Myr)	Thickness (m)	Preservation rate (m/Myr)	References
Seguili Formation	Spain	118	110	8	400	50	Skelton, P.W., Castro, J.M., Ruiz-ortiz, P.A., 2019. Aptian carbonate platform development in the Southern Iberian Palaeomargin ( Prebetic of Alicante , SE Spain ) . BSGF Earth Sciences Bulletin 190.
Benassal Formation	Spain	121	112	9	60	6.67	Bover-Arnal, T., Salas, R., Moreno-Bedmar, J.A., Bitzer, K., 2009. Sequence stratigraphy and architecture of a late Early-Middle Aptian carbonate platform succession from the western Maestrat Basin (Iberian Chain, Spain). Sedimentary Geology 219, 280–301. doi:10.1016/j.sedgeo.2009.05.016
Penascal Formation	Spain	124	123	1	200	200	Fernández-Mendiola, P.A., Mendicoa, J., Owen, H.G., García-Mondéjar, J., 2017. The Early Aptian (Cretaceous) stratigraphy of Mount Pagasarri (N Spain): Oceanic anoxic event-1a. Geological Journal 1–21. doi:10.1002/gj.3008
Sarvak Formation	Iran	99	90	9	250	27.78	Vincent, B., van Buchem, F.S.P., Bulot, L.G., Jalali, M., Swennen, R., Hosseini, A.S., Baghbani, D., 2015. Depositional sequences, diagenesis and structural control of the Albian to Turonian carbonate platform systems in coastal Fars (SW Iran). Marine and Petroleum Geology 63, 46–67. doi:10.1016/j.marpetgeo.2015.02.018
Tamaulipas Formation	Mexico	130	100	30	800	26.67	Wilson, J.L., Tucker, M.E., Crevello, P.D., Sarg, J.R. and Read, J.F., 1990. Basement structural controls on Mesozoic carbonate facies in northeastern Mexico-a review. In Carbonate Platforms: Facies, Sequences and Evolution (Vol. 9, pp. 235-255). Blackwell Boston.
Tamabra Formation	Mexico	123	100	23	1580	68.7	Enos, P., 1991. Sedimentary parameters for computer modeling. Kansas Geological Survey, Bulletin.
El Abra Formation	Mexico	130	100	30	1800	60	Wilson, J.L. and Ward, W.C., 1993. Early Cretaceous carbonate platforms of northeastern and east-central Mexico: Chapter 4.
Tizkuh Formation	Iran	130	100	30	500	16.67	Berberian, M. and King, G.C.P., 1981. Towards a paleogeography and tectonic evolution of Iran. Canadian journal of earth sciences, 18(2), pp.210-265.
Mustahil Formation	Somalia	116	100	16	200	12.5	Bosellini, A., 1992. The Continental Margins of Somalia Structural Evolution and Sequence Stratigraphy. AAPG Special Volumes.
Northeastern North American	United States	151	112	39	472	12.1	Jansa, L.F., 1993. Early Cretaceous Carbonate Platforms of the Northeastern North American Margin, in: Cretaceous Carbonate Platforms.
Northern Caucasus, Precaucasus	Russia	145	134	11	500	45.5	Kuznetsov, V.G., 1993. Late Jurassic–Early Cretaceous Carbonate Platform in the Northern Caucasus and Precaucasus. Cretaceous Carbonate Platforms. doi:10.1306/M56578C33
Mesopotomian Basin Sulaiy, Yamama, Ratawi formation	Iraq	145	134	11	200	18.2	Sadooni, F., Aqrawi, A., 2012. Cretaceous Sequence Stratigraphy and Petroleum Potential of the Mesopotamian Basin, Iraq. SEPM Special Publication 69, 315–334.
Habshan Formation	United Arab Emirates	145	138	7	200	28.6	van Buchem, F.S.P., Pittet, B., Hillgärtner, H., Français, I., Grötsch, J., Mansouri, A., Billing, I.M., Droste, H.H.J., Oterdoom, W.H., 2002. High-resolution Sequence Stratigraphic Architecture of Barremian / Aptian Carbonate Systems in Northern Oman and the United Arab Emirates ( Kharaib and Shu ’ aiba Formations ). GeoArabia 7, 461–500.
Thamana Group	United Arab Emirates	144	121	23	914	39.7	Alsharhan, A.S., 1987. Geology and Reservoir Characteristics of Carbonate Buildup in Giant Bu Hasa Oil Field , Abu Dhabi , United Arab Emirates ^. The American Association of Petroleum Geologist Bulletin 71, 1304–1318.
Andros Island	Bahamas	144	97.5	46.5	1196	25.7	Goodell, H.G., Garman, R.K., 1969. Carbonate geochemistry of Superior deep test well, Andros Island, Bahamas. American Association of Petroleum Geologists Bulletinn, v. 53, 513–536.
Long Island	Bahamas	144	65	79	4135	52.3	Meyerhoff, A.A., Hatten, C.W., 1974. Bahamas Salient of North America, in: Burk, C.A., Drake, C.L. (Eds.), The Geology of Continental Margins. Springer Berlin Heidelberg, Berlin, Heidelberg, pp. 429–446. doi:10.1007/978-3-662-01141-6_31
Shuaiba Formation	Middle East	144	113	31	666	21.5	Murris, R.J., 1980. Middle East: stratigraphic evolution and oil habitat: American Association of Petroleum Geologists Bulletin, v. 64.
Florida, Atlantic margin	Atlantic margin	144	97.5	46.5	3000	64.5	Owens, J.P., 1983. The northwestern Atlantic ocean margin. The Phanerozoic Geology of the World, II: The Mesozoic: New York (Elsevier) 33–60.
Lekhwair Formation	United Arab Emirates	133	129	4	100	25	van Buchem, F.S.P., Pittet, B., Hillgärtner, H., Français, I., Grötsch, J., Mansouri, A., Billing, I.M., Droste, H.H.J., Oterdoom, W.H., 2002. High-resolution Sequence Stratigraphic Architecture of Barremian / Aptian Carbonate Systems in Northern Oman and the United Arab Emirates ( Kharaib and Shu ’ aiba Formations ). GeoArabia 7, 461–500.
Mural carbonate shelf, Bisbee Group	United States	130	99.6	30.4	240	7.9	Scott, R.W., Warzeski, E.R., 1993. An Aptian–Albian Shelf Ramp, Arizona and Sonora. Cretaceous Carbonate Platforms, American Association of Petroleum Geologists Memoir. doi:10.1306/M56578C7
Urgonian vercors	France	129.4	121	8.4	600	71.4	Arnaud, A.A.H., Bernard, U.C., Masse, J.P., 1982. Caractères et Evolution des Plates-formes Carbonatées Périvocontiennes au Crétacé Inférieur ( France Sud-Est ). Cretaceous Research 3–18
Urgonian Provence	France	129.4	117.4	12	540	45	Masse, J., Allemann, J., 1982. Relations entre les Series Carbonatees de Plate-forme Provenple et Sarde au Cretace Inferieur. Cretaceous Research 3, 19–33.
Kharaib Formation	United Arab Emirates	129	125	4	150	37.5	van Buchem, F.S.P., Pittet, B., Hillgärtner, H., Français, I., Grötsch, J., Mansouri, A., Billing, I.M., Droste, H.H.J., Oterdoom, W.H., 2002. High-resolution Sequence Stratigraphic Architecture of Barremian / Aptian Carbonate Systems in Northern Oman and the United Arab Emirates ( Kharaib and Shu ’ aiba Formations ). GeoArabia 7, 461–500.
Provence	France	128	125.7	2.3		80	Masse, J.P., Fenerci-Masse, M., 2006. Carbonate production by rudist bivalves. The record of Late Barremian requieniid communities from Provence (SE France). Palaeogeography, Palaeoclimatology, Palaeoecology 234, 239–257. doi:10.1016/j.palaeo.2005.10.010
Kopet Dagh Bojnurd	Iran	127	120	7	200	28.6	Carević, I., Taherpour Khalil Abad, M., Ljubović-Obradović, D., Vaziri, S.H., Mirković, M., Aryaei, A.A., Stejić, P., Ashouri, A.R., 2013. Comparisons between the Urgonian platform carbonates from eastern Serbia (Carpatho-Balkanides) and northeast Iran (Kopet-Dagh Basin): Depositional facies, microfacies, biostratigraphy, palaeoenvironments and palaeoecology. Cretaceous Research 40, 110–130. doi:…
Nagyharsany Villany Mts	Hungary	127	120	7	200	28.6	Csaszar, G., 1997. Sedimentary environments of the Urgonian formations of Hungary. Mineralia Slovaca 29, 265–266
Okusmedere formation	Turkey	127	123	4	100	25	Masse, J.P., Tüysüz, O., Fenerci-Masse, M., Özer, S., Sari, B., 2009. Stratigraphic organisation, spatial distribution, palaeoenvironmental reconstruction, and demise of Lower Cretaceous (Barremian-lower Aptian) carbonate platforms of the Western Pontides (Black Sea region, Turkey). Cretaceous Research 30, 1170–1180. doi:10.1016/j.cretres.2009.05.004
Ostov	Romania	127	120	7	30	4.3	Neagu, T., Pana, I., Dragastan, O., 1977. Biostratigraphie de la série des calcaires éocrétacés de l’aire Cernavoda-Alimanu-Ostrov. Revue Roumaine de Géologie, géophysique et géographie, Géologie 21, 137–144.
Povanska Bystrica Manin	Slovakia	127	123	4	100	25	Rakus, M., 1984. Guide to geological excursion in the West Carpathian Mounts. IGCP project 198, Evolution of the northern margin of Tethys.
Montsech	Spain	127	121	6	100	16.7	Schroeder, R., Altenbach, A., Brinnel, P., Cherchi, A., Wallrabe, H., 1982. El Barremiense marino de la Sierra de Montsec (Prov. Lerida-Huesca). Cuadernos Geologia Iberica 8, 915–933.
Kolomya Marmarosch	Ukraine	127	120	7	100	14.3	Tchernov, V.G., Yanin, B.T., Golovinova, M.A., Gorbatchik, T.N., Kuzmicheva, E.I., Mikhailova, I.A., Smirnova, T.N., 1980. Dépôts urgoniens des Carpathes soviétiques.
Aptian	Spain	126.3	116.3	10		40	Bonin, A., 2011. Relations entre les variations climatiques, les perturbations du cycle du carbone et les crises de la production carbonatée : Application au Crétacé inférieur. Université de Bourgogne.
Bearn Arzacq	France	126	121	5	400	80	Barreyre, M., Delfaud, J., 1965. Etude stratigraphique du Néocomien rencontré par les sondages de la Société Nationale des Pétroles d’Aquitaine (SNPA) en Aquitaine occidentale. Mémoire BRGM 34, 625–635.
Antromero formation	Spain	126	123	3	130	43.3	González-Fernández, B., Menéndez-Casares, E., Vicedo, V., Araburu, C., Caus, E., 2014. New insights about the Upper Jurassic - Lower Cretaceous sedimentary successions from Asturias (NW Iberian Peninsula). Journal of Iberian Geology 40, 409–430. doi:10.5209/rev_JIGE.2014.v40.n3.4307
Pyrenees Organya	Spain	126	123	3	150	50	Peybernès, B., 1976. Le Jurassique et le Crétacé inférieur des Pyrénées franco-espagnoles entre la Garonne et la Méditerranée. Sciences Naturelles, Toulouse.
Barremian, Marseille	France	125	119	6	350	58.3	Arnaud, A.A.H., Bernard, U.C., Masse, J.P., 1982. Caractères et Evolution des Plates-formes Carbonatées Périvocontiennes au Crétacé Inférieur ( France Sud-Est ). Cretaceous Research 3–18
Texas Sligo PF	United States	125	120	5	200	40	Bebout, D., Budd, D., Schatzinger, R., 1981. Depositional and Diagenetic History of the Sligo and Hosston Formations (Lower Cretaceous) in South Texas.
Harar	Ethiopia	125	123	2	10	5	Bosellini, A., Russo, A., Schroeder, R., 1999. Stratigraphic evidence for an Early Aptian sea-level fluctuation: The Graua Limestone of south-eastern Ethiopia. Cretaceous Research 20, 783–791. doi:10.1006/cres.1999.0183
Padurea Craiului Ecleja formation	Romania	125	120	5	410	82	Bucur, I., 1999. Lower cretaceous dasyclad algae from the padurea craiului massif (northern apuseni mountains, romania) i. Acta Palaeontologica Romaniae 2, 53–72.
Gareb Tiztoutine	Morocco	125	120	5	100	20	Canerot, J., Cugny, P., Peybernès, B., Rahhali, I., Rey, J., Thieuloy, J.P., 1986. Comparative study of the Lower and Mid-Cretaceous sequences on different Maghrebian shelves and basins-their place in the evolution of the North African Atlantic and Neotethysian margins. Palaeogeography, Palaeoclimatology, Palaeoecology 55, 213–232. doi:10.1016/0031-0182(86)90151-3
Mts Oulad Nail Bou Saada	Algeria	125	120	5	150	30	Emberger, J., 1954. Notes sur la stratigraphie et la paléontologie de l’Aptien de Bordj Outem, région de Bou-Saada (Département d’Alger),. Bulletin de la Societe Geologique de France 6, 145–150.
Baleares	Spain	125	112	13	150	11.5	Fourcade, E., Chauve, P., Chabrier, G., 1982. Stratigraphie et tectonique de l’île d’Ibiza, témoin du prolongement de la nappe subbétique aux Baléares (Espagne). Eclogae geol. Helv 75, 415–436.
Chotts region Orbata formation	Tunisia	125	123	2	40	20	Godet, A., 2013. Drowning unconformities: Palaeoenvironmental significance and involvement of global processes. Sedimentary Geology 293, 45–66. doi:10.1016/j.sedgeo.2013.05.002
Falaise de Blanche	Lebanon	125	120	5	60	12	Maksoud, S., Granier, B., Azar, D., Gèze, R., Paicheler, J.-C., Moreno-Bedma, J.A., 2014. Revision of “Falaise de Blanche” (Lower Cretaceous) in Lebanon, with the definition of a Jezzinian Regional Stage. Carnets de géologie (Notebooks on geology) 14. doi:10.4267/2042/54359
Cupido formation	Mexico	125	113	12	610	50.8	Moore, 1977. Paleoenvironmental Analysis of Lower Cretaceous Cupido Formation, in: Gulf Coast Association of Geological Societies Transactions. doi:10.1306/C1EA46CB-16C9-11D7-8645000102C1865D
Bakony Mts	Hungary	125	120	5	200	40	Nikolov, 1987. The Mediterranean Lower Cretaceous. Bulgarian Academyof Sciences, Sofia University
Parentis Mimizan	France	125	123	2	25	12.5	Séronie-Vivien, R., Sens, J., Malmoustier, G., 1965. Contribution à l’étude des formations du crétacé inférieur dans le bassin de parentis (Aquitaine). Mémoire BRGM 34, 669–692.
Daiichi-Kashima Seamount	Japan	125	93.6	31.4	900	28.7	Shiba, M., 1993. on the Daiichi-Kashima Seamount at the Junction of the Japan and Izu-Bonin Trenche, in: Cretaceous Carbonate Platforms.
Maracaibo platform	Venezuela	125	99.6	25.4	200	7.9	Vahrenkamp, V.C., 1993. Maracaibo Platform (Aptian-Albian), Northwestern Venezuela. American Association of Petroleum Geologists Memoir 56, 25–33.
Shuêaiba formation	United Arab Emirates	125	115	10	150	15	van Buchem, F.S.P., Pittet, B., Hillgärtner, H., Français, I., Grötsch, J., Mansouri, A., Billing, I.M., Droste, H.H.J., Oterdoom, W.H., 2002. High-resolution Sequence Stratigraphic Architecture of Barremian / Aptian Carbonate Systems in Northern Oman and the United Arab Emirates ( Kharaib and Shu ’ aiba Formations ). GeoArabia 7, 461–500.
Ain M'lila region Djebel Guedmane	Algeria	125	120	5	50	10	Vila, 1980. La chaîne alpine d’Algérie orientale et des confins algéro-tunisiens. Paris.
Mosul, Persian gulf	Iraq	125	97.5	27.5	1000	36.4	Wilson, J.L., 1975. Carbonate Facies in Geologic History. Springer New York, New York, NY. doi:10.1007/978-1-4612-6383-8
Pinarbasi, Taurus platform	Turkey	125	120	5	40	8	Yilmaz, I.Ö., Altiner, D., Vennemann, T., Satir, M., 2004. Stable isotope evidence for meter-scale sea level changes in lower Cretaceous inner platform and pelagic carbonate successions of Turkey. Geologica Carpathica 55, 19–36.
Navarre Madotz Aralar Mts Sarastari formation	Spain	124	121	3	170	56.7	Bodego, A., Iriarte, E., Agirrezabala, L.M., García-Mondéjar, J., López-Horgue, M.A., 2015. Synextensional mid-Cretaceous stratigraphic architecture of the eastern Basque-Cantabrian basin margin (western Pyrenees). Cretaceous Research 55, 229–261. doi:10.1016/j.cretres.2015.01.006
Djebel Koumine Berrani mbr	Tunisia	124	120	4	200	50	Masse J.-P., Skelton P. W., Sliskovic T. 1984. Glossomyophorus costatus, nov. gen. nov. sp., rudiste (Caprotinidae) nouveau de l’Aptien du domaine Méditerranéen central et oriental. Géobios, Villeurbanne, 17, 6, 723-732.
Continguiba carbonate, Sergipe basin	Brazil	120	88	32	500	15.6	Koutsoukos, E.A.M., Spadini, A.R., 1993. Upper Aptian-Lower Coniacian Carbonate Sequences in the Sergipe Basin , Northeastern Brazil, in: Cretaceous Carbonate Platforms.
Urgonian	Spain	119	97.5	21.5	4000	186	García‐Mondéjar, J., 1986. The Aptian—Albian Carbonate Episode of the Basque—Cantabrian Basin (Northern Spain): General Characteristics, Controls and Evolution, in: Carbonate Platforms: Facies, Sequences and Evolution. doi:doi.org/10.1002/9781444303834.ch10
Glen Rose limestone	United States	115	110.5	4.5	189	42	Perkins, B.F., 1985. Caprinid reefs and related facies in the Comanche Cretaceous Glen Rose limestone of central Texas, in: Lower Cretaceous Depositional Environments from Shoreline to Slope–a Core Workshop. GCAGS–GCS/SEPM Ann Meet, Pp129–140.
El Abra Formation	Mexico	113	91	22	1800	81.8	Enos, P., 1986. Diagenesis of Mid-Cretaceous Rudist Reefs, Valles Platform, Mexico, in: Schroeder, J.H., Purser, B.H. (Eds.), Reef Diagenesis. Springer Berlin Heidelberg, Berlin, Heidelberg, pp. 160–185. doi:10.1007/978-3-642-82812-6_9
Mishrif formation	United Arab Emirates	113	89	24	300	12.5	van Buchem, F.S.P., Pittet, B., Hillgärtner, H., Français, I., Grötsch, J., Mansouri, A., Billing, I.M., Droste, H.H.J., Oterdoom, W.H., 2002. High-resolution Sequence Stratigraphic Architecture of Barremian / Aptian Carbonate Systems in Northern Oman and the United Arab Emirates ( Kharaib and Shu ’ aiba Formations ). GeoArabia 7, 461–500.
Golden Lane Platform	Mexico	113	91	22	2992	136	Wilson, J.L., 1975. Carbonate Facies in Geologic History. Springer New York, New York, NY. doi:10.1007/978-1-4612-6383-8
Baleares	Spain	112	99.6	12.4	100	8.1	Fourcade, E., Chauve, P., Chabrier, G., 1982. Stratigraphie et tectonique de l’île d’Ibiza, témoin du prolongement de la nappe subbétique aux Baléares (Espagne). Eclogae geol. Helv 75, 415–436.
Djebel Semmama	Tunisia	108	100	8	300	37.5	Bismuth, H., Boltenhagen, C., Donze, P., Le Fèvre, J., Saint-Marc, P., 1982. Etude Sédimentologique et Biostratigraphique du Crétacé Moyen et Supérieur du Djebel Semmama "(Tunisie du Centre Nord )”. Cretaceous Research 3, 171–185.
Provence, Marcouline	France	102	88.6	13.4	100	7.5	Philip, J., 1993. Late Cretaceous Carbonate-Siliciclastic Platforms of Provence , Southeastern France. AAPG Memoir 56, 375–385.
Djebel Semmama	Tunisia	100	93.9	6.1	400	65.6	Bismuth, H., Boltenhagen, C., Donze, P., Le Fèvre, J., Saint-Marc, P., 1982. Etude Sédimentologique et Biostratigraphique du Crétacé Moyen et Supérieur du Djebel Semmama "(Tunisie du Centre Nord )”. Cretaceous Research 3, 171–185.
Midele-upper Cenomanian, Gargano	Italy	100	95	5		200	Borgomano, J.R.F., 2000. The Upper Cretaceous carbonates of the Gargano-Murge region, southern Italy: A model of platform-to-basin transition. AAPG Bulletin 84, 1561–1588. doi:10.1306/8626bf01-173b-11d7-8645000102c1865d
Mid Cretaceous	Mexico	100	85	15		100	Emberger, J., 1954. Notes sur la stratigraphie et la paléontologie de l’Aptien de Bordj Outem, région de Bou-Saada (Département d’Alger),. Bulletin de la Societe Geologique de France 6, 145–150.
Bahamas	United States	100	0	100		40	Tucker, Wright, V.P., 1990. Carbonate Sedimentology, Carbonate Sedimentology. doi:10.1002/9781444314175
Baleares	Spain	99.6	88.6	11	350	31.8	Fourcade, E., Chauve, P., Chabrier, G., 1982. Stratigraphie et tectonique de l’île d’Ibiza, témoin du prolongement de la nappe subbétique aux Baléares (Espagne). Eclogae geol. Helv 75, 415–436.
Montagna della Maiella	Italy	99.6	88.6	11	20	1.8	Sanders, D., 1996. Rudist biostromes on the margin of an isolated carbonate platform : the Upper Cretaceous of Rudist biostromes on the margin of an isolated carbonate platform : The Upper Cretaceous of Montagna della Maiella , Italy. Eclogae Geologicae Helvetiae 89, 845–871.
Rocca di Cave	Italy	97.5	91	6.5	300	46.2	Carbone, F., Sirna, G., 1981. Upper Cretaceous Reef Models from Rocca Di Cave and Adjacent Areas in Latium, Central Italy. European Fossil Reef Models. doi:10.2110/pec.81.30.0427
Lullemmeden Basin,	Niger	94	92	2	100	50	Pascal, A.F., Mathey, B.J., Alzouma, K., Lang, J., Meister, C., 1993. Late Cenomanian-Early Turonian Shelf Ramp, Niger, West Africa. Cretaceous Carbonate Platforms. doi:10.1306/M56578C12
Djebel Semmama	Tunisia	93.9	89.8	4.1	300	73.2	Bismuth, H., Boltenhagen, C., Donze, P., Le Fèvre, J., Saint-Marc, P., 1982. Etude Sédimentologique et Biostratigraphique du Crétacé Moyen et Supérieur du Djebel Semmama "(Tunisie du Centre Nord )”. Cretaceous Research 3, 171–185.
Iberian Seaway	Spain	93.6	69	24.6	200	8.1	Alonso, A., Floquet, M., Mas, R., Meléndez, A., 1993. Late Cretaceous Carbonate Platforms: Origin and Evolution, Iberian Range, Spain. Cretaceous Carbonate Platforms. doi:10.1306/M56578C24
Bireno carbonate platform	Algeria, Tunisia	93.6	88.6	5	80	16	Camoin, G.F., 1993. Turonian and Coniacian Carbonate Platforms from the African Tethyan Margin, Algeria, Tunisia. Cretaceous Carbonate Platforms. doi:10.1306/M56578C13
Sinai, Wata formation	Egypt	91	88.6	2.4	100	41.7	Bauer, J.A.N., Kuss, J., Steuber, T., 2003. Sequence architecture and carbonate platform configuration (Late Cenomanian – Santonian), Sinai , Egypt. Sedimentology 50, 387–414.
Douleb carbonate platform	Algeria, Tunisia	88.6	85.8	2.8	100	35.7	Camoin, G.F., 1993. Turonian and Coniacian Carbonate Platforms from the African Tethyan Margin, Algeria, Tunisia. Cretaceous Carbonate Platforms. doi:10.1306/M56578C13
Duwi Formation	Egypt	83.5	65.5	18	30	1.7	Shaaban, M.N., Holail, H.M., Rashed, M.A., El-Askary, M., Rashed, M.A., 1995. Environment and diagenesis of an Upper Cretaceous Bioclastic Oyster Limestone Bed, Red Sea Coast, Egypt. Facies 33, 121–128.
Campanian, Gargano	Italy	83	76	7	161	23	Borgomano, J.R.F., 2000. The Upper Cretaceous carbonates of the Gargano-Murge region, southern Italy: A model of platform-to-basin transition. AAPG Bulletin 84, 1561–1588. doi:10.1306/8626bf01-173b-11d7-8645000102c1865d
Maastrichtian, Gargano	Italy	72	63	9		66	Borgomano, J.R.F., 2000. The Upper Cretaceous carbonates of the Gargano-Murge region, southern Italy: A model of platform-to-basin transition. AAPG Bulletin 84, 1561–1588. doi:10.1306/8626bf01-173b-11d7-8645000102c1865d
